# Supplementary material for: Sub-clinical detection of gut microbial biomarkers of obesity and type 2 diabetes
Source: PubMed Central journal article supplement (PMC4756455; doi:10.1186/s13073-016-0271-6), 2016-02-17

# Supplementary Figure 3

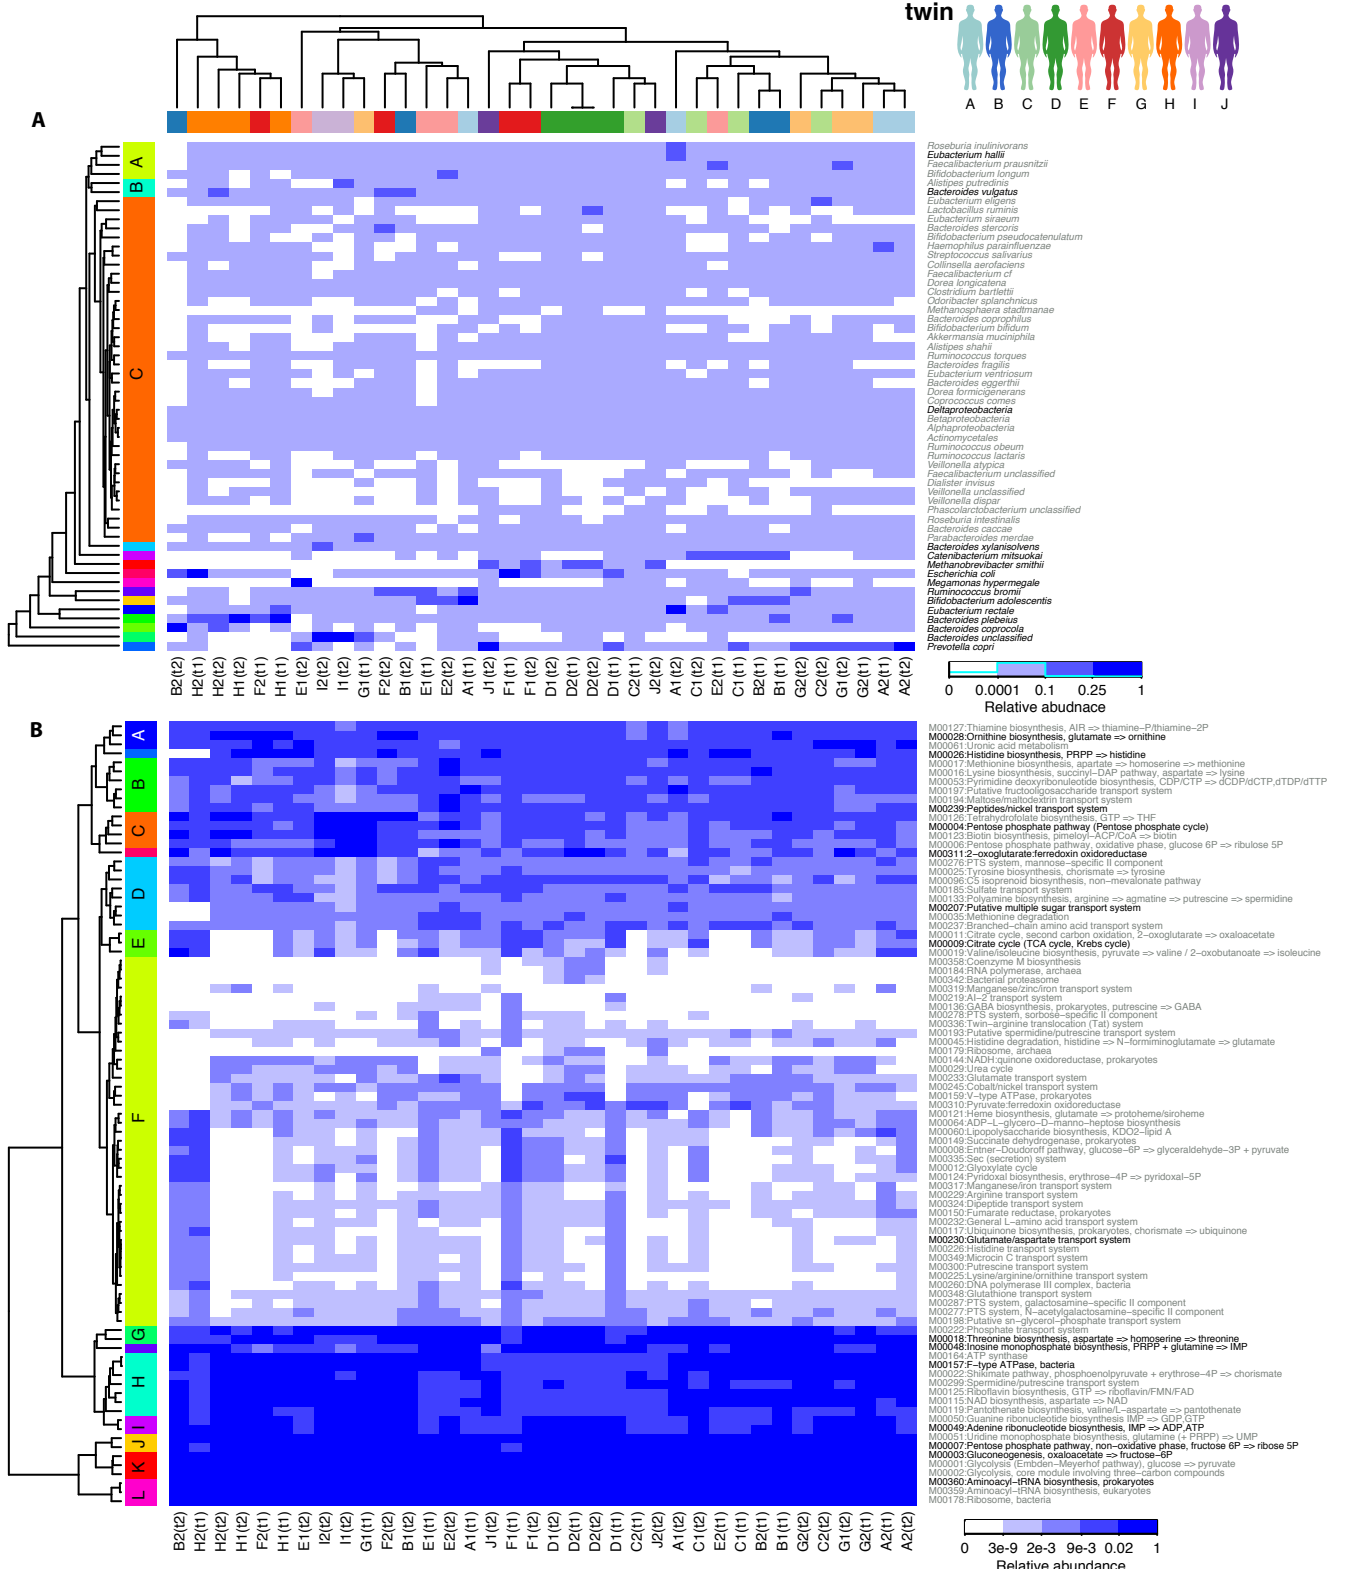

Supplement: 13073_2016_271_MOESM5_ESM.pdf [file 13073_2016_271_MOESM5_ESM.pdf]
